# Supplementary material
Source: MDPI journal article supplement (https://www.mdpi.com/2226-471X/9/3/103)
Supplement: s1 [file s1]

**Table S1: Experimental Stimuli**

| CV      | CVC       | targets |
|---------|-----------|---------|
| balada  | balseo    | ba/bal  |
| paloma  | palmera   | pa/pal  |
| bolero  | bolsillo  | bo/bol  |
| maleta  | maltrato  | ma/mal  |
| culebra | cultura   | cu/cul  |
| molino  | moldura   | mo/mol  |
| salario | salchicha | sa/sal  |
| pulido  | pulsera   | pu/pul  |
| ceniza  | censura   | ce/cen  |
| linaje  | linterna  | li/lin  |
| moneda  | montaña   | mo/mon  |
| conejo  | consejo   | co/con  |
| canasta | candado   | ca/can  |
| penuria | pendiente | pe/pen  |
| sonido  | sonrisa   | so/son  |
| panera  | pandilla  | pa/pan  |
| casino  | castillo  | ca/cas  |
| peseta  | pescado   | pe/pes  |
| cosecha | costilla  | co/cos  |
| rosario | rosquilla | ro/ros  |
| basura  | bastante  | ba/bas  |
| resaca  | restante  | re/res  |
| gusano  | gustazo   | gu/gus  |
| pasado  | pastilla  | pa/pas  |
